# Supplementary material for: Use of targeted SNP selection for an improved anchoring of the melon (Cucumis melo L.) scaffold genome assembly
Source: PubMed Central journal article supplement (PMC4316794; doi:10.1186/s12864-014-1196-3), 2015-01-22

LG I

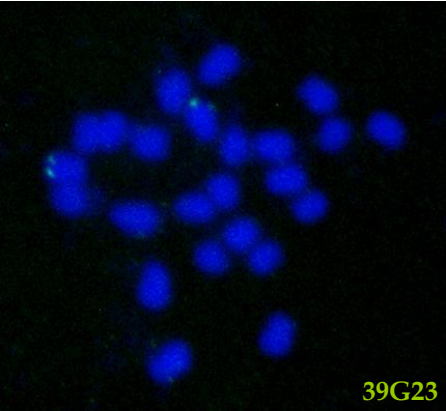

LG II

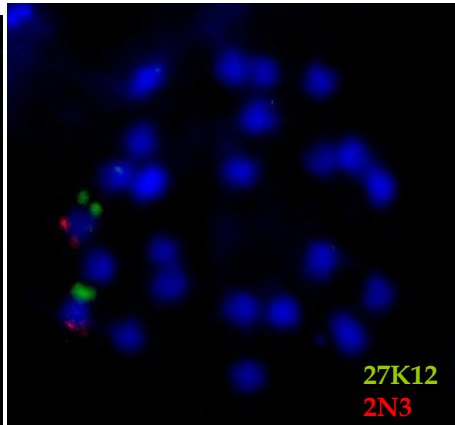

LG III

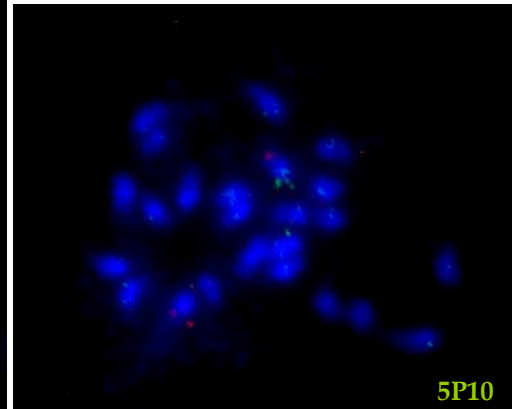

LG IV

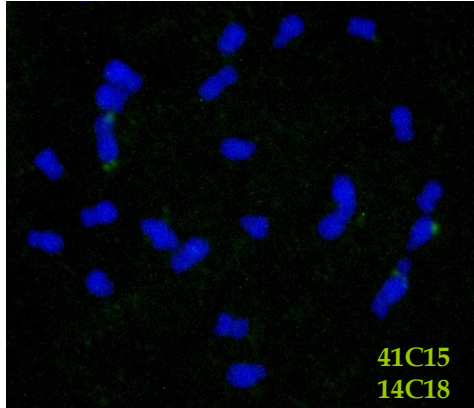

LG V

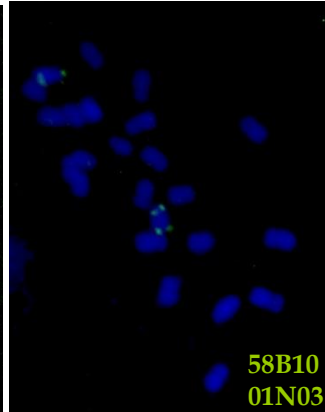

LG VI

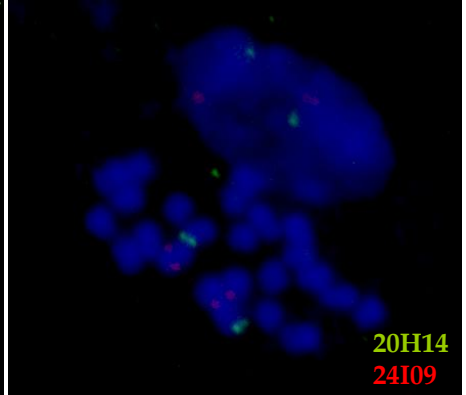

LG VIII

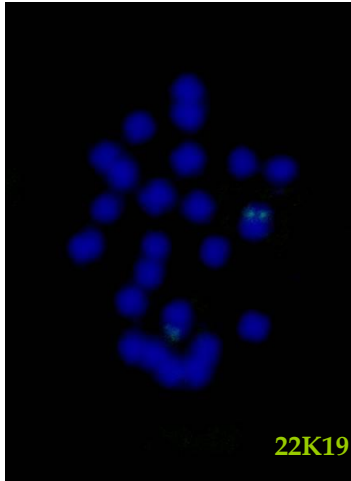

LG VII

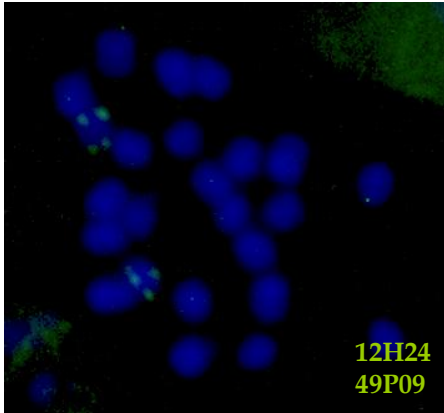

LG IX

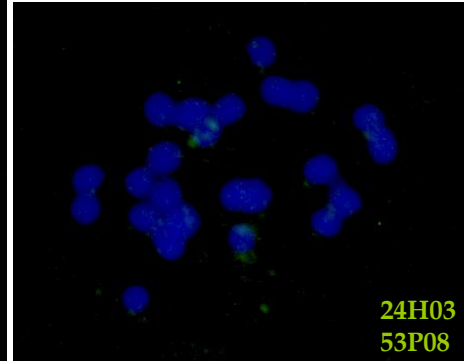

LG X

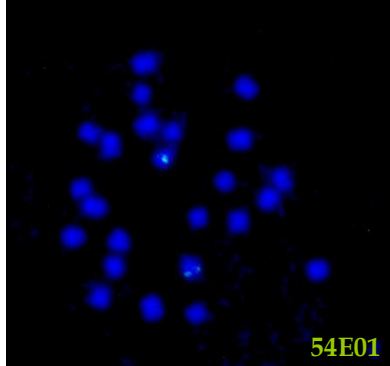

LG XI

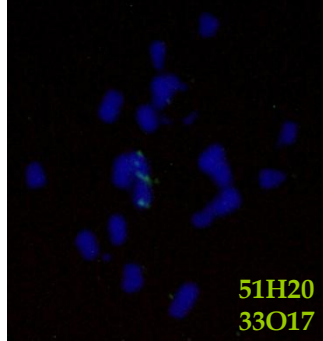

LG XII

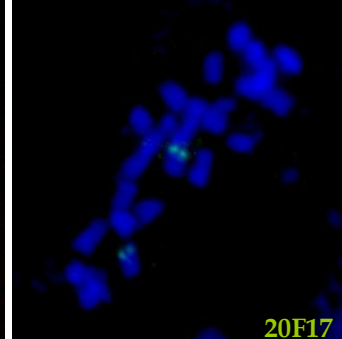

Supplement: 12864_2014_1196_MOESM2_ESM.pdf [file 12864_2014_1196_MOESM2_ESM.pdf]
